# Supplementary material
Source: Springer Nature journal article supplement (https://www.springermedizin.de/resource/supplementary/13256_2010_1562_MOESM1_ESM.pdf/9647992)

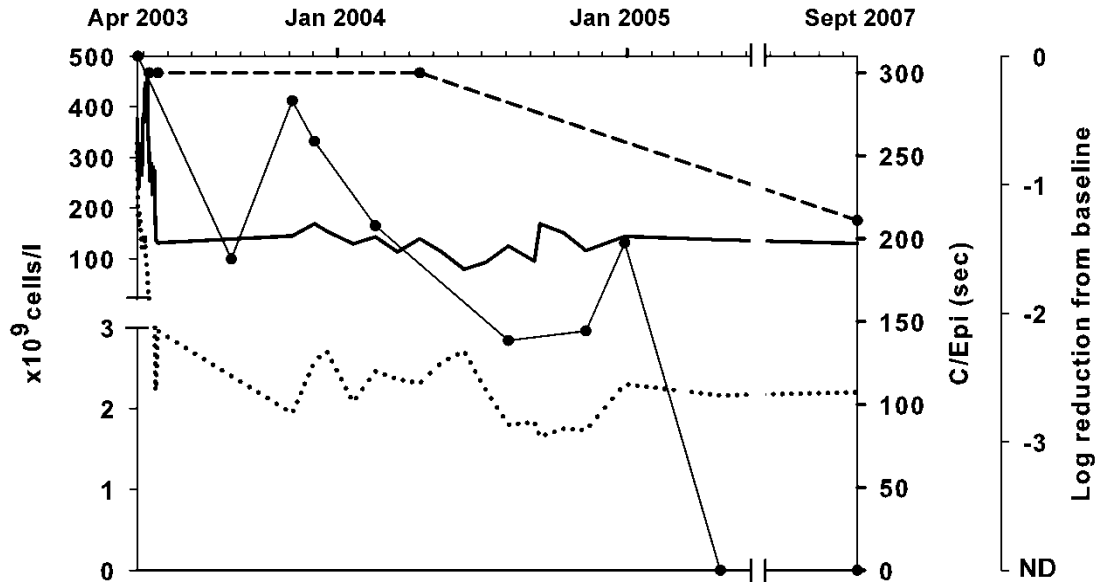

Bleeding

Gleevec

400mg

600mg

800mg

..... Leukocytes

— Platelets

-●- C/Epi

—●- BCR-ABL

Supplement: MOESM1 [file 9647992]
